# Supplementary material
Source: Springer Nature journal article supplement (https://www.springermedizin.de/resource/supplementary/12889_2007_1239_MOESM1_ESM.pdf/9502758)

- Home (in/outdoor)
- Road outside village
- Street/ alley inside village
- Farm
- Work other than farm
- Other

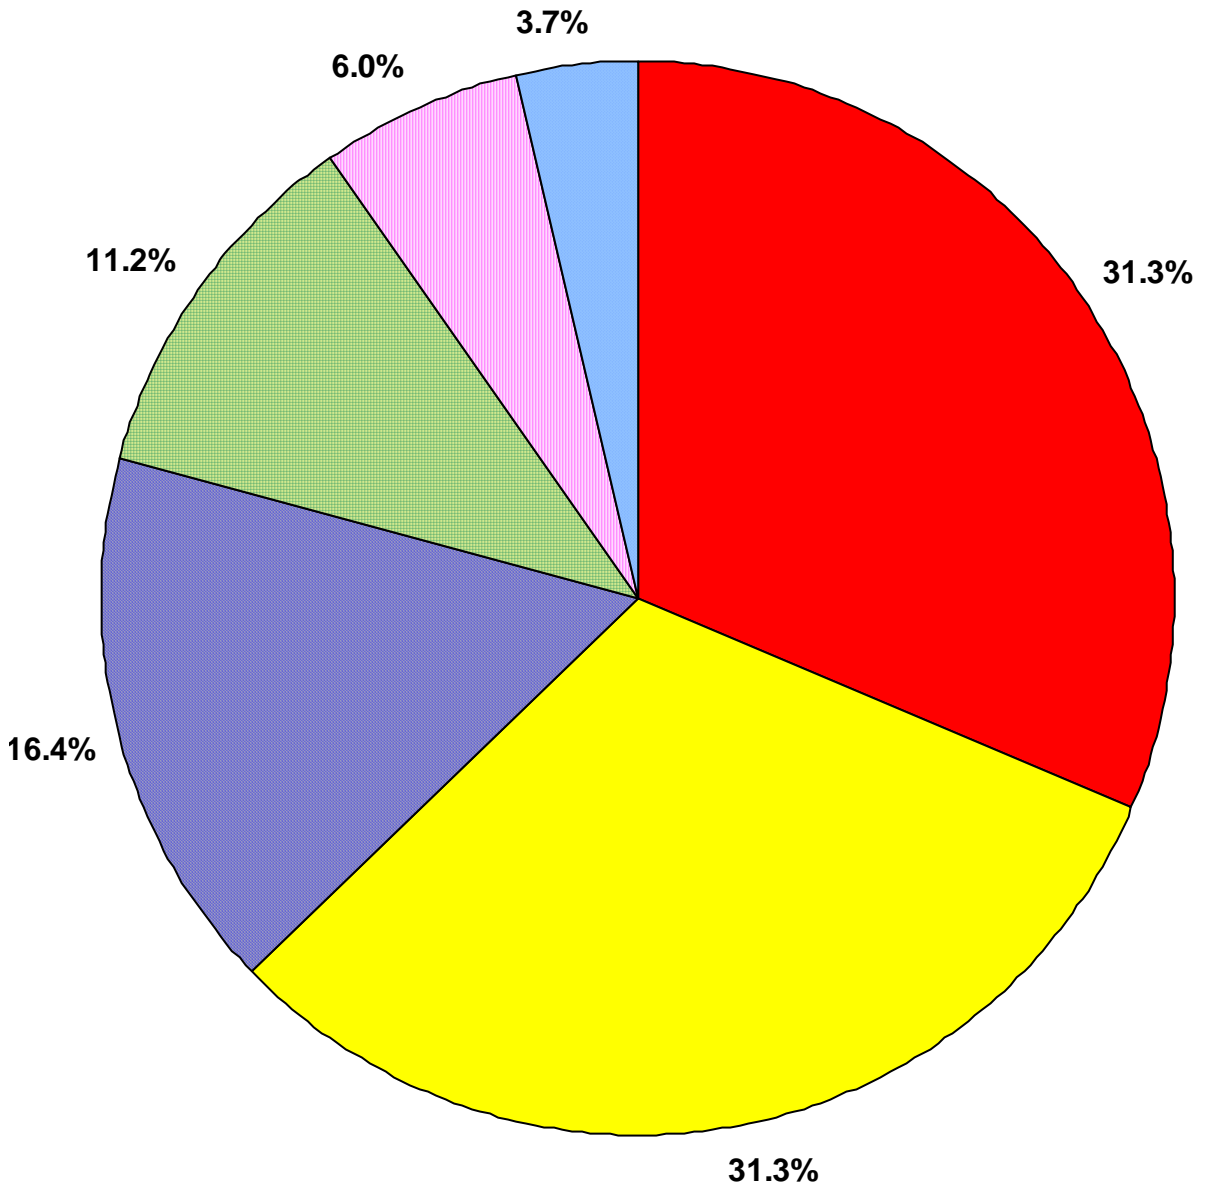

Supplement: MOESM1 [file 9502758]
